# Supplementary material for: Safety and immunogenicity of booster vaccination and fractional dosing with Ad26.COV2.S or BNT162b2 in Ad26.COV2.S-vaccinated participants
Source: PubMed Central journal article supplement (PMC10690356; doi:10.1101/2023.11.20.23298785), 2023-11-20
Supplement: NIHPP2023.11.20.23298785v1-supplement-1.pdf [file NIHPP2023.11.20.23298785v1-supplement-1.pdf]

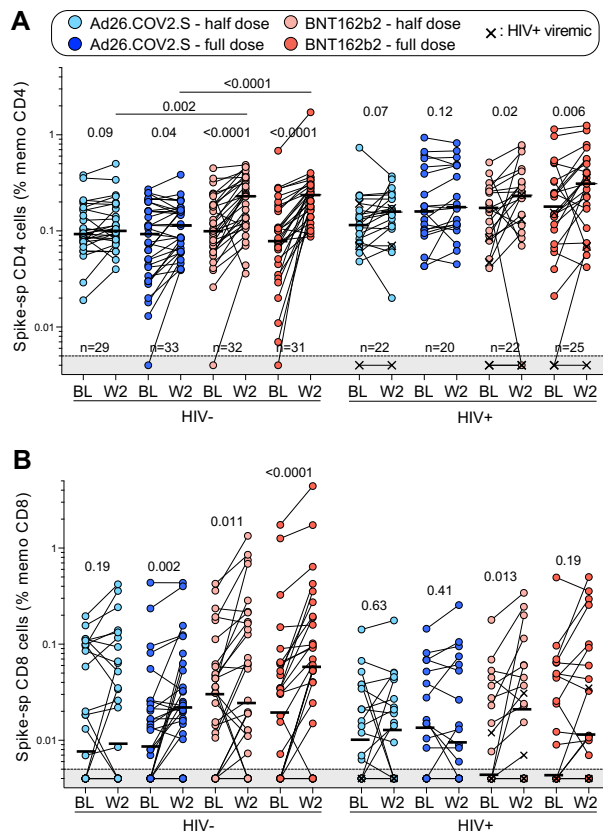

**Supplemental Figure 1: SARS-CoV-2 spike-specific T cell responses in participants stratified by HIV status in each study arm.** Frequency of spike-specific CD4<sup>+</sup> T cells (**A**) and spike-specific CD8<sup>+</sup> T cells (**B**) before (BL) and 2 weeks after vaccine boost (W2) in HIV-negative participants and in PLWH. Bars represent medians. Viremic PLWH are identified with a cross. Bars represent medians. A two-tailed Wilcoxon signed-rank test was used to assess statistical differences between paired samples and a Kruskal-Wallis with Dunn's corrections was used to compare different groups.

**Supp Table 1**

|                                     | Vax-naive  | J&J primed | J&J boosted  |
|-------------------------------------|------------|------------|--------------|
| N                                   | 14         | 14         | 6            |
| Age*                                | 46 (37-57) | 46 (37-57) | 55 (49-57)   |
| Gender (% female)                   | 100%       | 100%       | 100%         |
| Time since last vaccination (days)* | na         | 44 (31-53) | 110 (96-117) |

**Supplementary Table 1: Clinical characteristics of samples used for Ad26-specific antibody response assessment.** (Related to Figure 10F). \*: Median and Interquartile range (IQR), na: not applicable.

**Supp Table 2**

|                                | Vax-naive  | J&J primed |
|--------------------------------|------------|------------|
| N                              | 20         | 11         |
| Age*                           | 43 (33-53) | 49 (32-53) |
| Gender (% female)              | 90%        | 81.8%      |
| Time since vaccination (days)* | na         | 25 (20-45) |

**Supplementary Table 2: Clinical characteristics of samples used for Ad26-specific T cell response assessment.** (Related to Figures 11D and 11G). All participants were HIV-uninfected. \*: Median and Interquartile range (IQR). na: not applicable.
